# Supplementary material
Source: publisher figshare collection journal article supplement (https://acs.figshare.com/ndownloader/files/8410868)
Supplement: Supplementary file 1 [file 8410868]

## **Supporting Information for Publication**

### **Neutron and atomic resolution X-ray structures of a lytic polysaccharide monooxygenase reveal copper-mediated dioxygen binding and evidence for N-terminal deprotonation**

John-Paul Bacik<sup>1†</sup>, Sophanit Mekasha<sup>2</sup>, Zarah Forsberg<sup>2</sup>, Andrey Y. Kovalevsky<sup>3</sup>, Gustav Vaaje-Kolstad<sup>2</sup>, Vincent G.H. Eijsink<sup>2</sup>, Jay C. Nix<sup>4</sup>, Leighton Coates<sup>3</sup>, Matthew J. Cuneo<sup>3</sup>, Clifford J. Unkefer<sup>1</sup>, Julian C.-H. Chen<sup>1\*</sup>

<sup>1</sup>Protein Crystallography Station, Bioscience Division, Los Alamos National Laboratory, Los Alamos, NM 87545 USA; <sup>2</sup>Department of Chemistry, Biotechnology and Food Science, Norwegian University of Life Sciences (NMBU), PO Box 5003, 1430 Ås, Norway; <sup>3</sup>Biology and Soft Matter Division, Oak Ridge National Laboratory, 1 Bethel Valley Road, PO Box 2008, Oak Ridge, TN 37831 USA; <sup>4</sup>Advanced Light Source, Lawrence Berkeley Laboratory, 1 Cyclotron Road, Berkeley, CA 94720 USA

#### **Materials and Methods**

**Table S1**

**Table S2**

**Figure S1**

**Figure S2**

**Figure S3**

## Materials and Methods

Expression, purification, crystallization and data collection were previously described in Bacik *et al.*, 2015.

*X-ray structure refinement.* The X-ray structure of JdLPMO10A was solved by molecular replacement using the 100 K structure of JdLPMO10A, PDB 5aa7 (Mekasha *et al.*, 2016) as a search model, and refined in Phenix using positional, anisotropic B factor (heavy atoms only, including solvent atoms, ions, and the dioxygen species), and occupancy refinement. Waters were automatically added using Phenix. Riding hydrogens and deuteriums were added in the later stages of refinement. No charges were introduced, e.g. the copper ion was modeled as Cu (29 electrons), and not as Cu<sup>+</sup> (28 electrons) or Cu<sup>2+</sup> (27 electrons). Likewise, oxygen atoms in the peroxide were treated as neutral species (8 electrons). Data processing and refinement statistics are reported in Table S1.

*Neutron structure refinement.* Using a partially refined model of JdLPMO10A (~20 % R<sub>free</sub>), containing isotropic temperature factors, the model was refined against neutron data alone, in Phenix. Deuterium atoms were added to solvent molecules as D<sub>2</sub>O, and deuterium was introduced at exchangeable sites on the protein molecule and their relative occupancies were allowed to refine. Nonexchangeable sites remained modeled as H. In the initial maps, solvent molecules that were not visible at 1.0 sigma in the 2F<sub>o</sub>-F<sub>c</sub> maps were removed to reflect the slight differences between the crystal used for neutron diffraction and crystal used for X-ray diffraction. The structure was refined using positional, isotropic B factor, and occupancy refinement. The quality of the model was confirmed using a composite omit map in Phenix, which showed the continuous density for the dioxygen species. Data quality and refinement statistics are reported in Table S1.

**Table S1. Data collection and refinement statistics**

|                                                                            | <b>X-ray (5VG0)</b>                                    | <b>Neutron (5VG1)</b>                                  |
|----------------------------------------------------------------------------|--------------------------------------------------------|--------------------------------------------------------|
| <b>Data collection</b>                                                     |                                                        |                                                        |
| Diffraction source                                                         | Beamline 4.2.2, ALS                                    | MaNDi, ORNL                                            |
| Wavelength (Å)                                                             | 1.000                                                  | 2 - 4                                                  |
| Detector                                                                   | RDI 8M CMOS                                            | 27 SNS Anger Cameras                                   |
| Temperature (K)                                                            | 295                                                    | 295                                                    |
| Crystal-to-detector distance (mm)                                          | 100                                                    | 450                                                    |
| Rotation range per image (deg)                                             | 0.2                                                    | Fixed                                                  |
| Total rotation range                                                       | 180                                                    | 120                                                    |
| Exposure time per image                                                    | 0.1 s                                                  | 20 h                                                   |
| Space group                                                                | P2 <sub>1</sub> 2 <sub>1</sub> 2 <sub>1</sub>          | P2 <sub>1</sub> 2 <sub>1</sub> 2 <sub>1</sub>          |
| Cell (Å)                                                                   | 32.0, 75.6, 120.4                                      | 32.5, 76.4, 122.1                                      |
| Mosaicity                                                                  | 0.07                                                   | N/A                                                    |
| Resolution range (Å)                                                       | 32.0 – 1.1 (1.16 – 1.10)                               | 12.0 – 2.1 (2.17 – 2.1)                                |
| Reflections                                                                | 1248110 (170145)                                       | 62823 (2757)                                           |
| Unique reflections                                                         | 116274 (16352)                                         | 13989 (1091)                                           |
| Completeness (%)                                                           | 97.3 (95.0)                                            | 76.02 (59.4)                                           |
| Multiplicity                                                               | 10.7 (10.4)                                            | 4.5 (2.5)                                              |
| <I / $\sigma$ (I)>                                                         | 13.7 (1.5)                                             | 9.4 (2.7)                                              |
| R <sub>pim</sub>                                                           | 0.031 (0.436)                                          | 0.089 (0.196)                                          |
| Wilson B (Å <sup>2</sup> )                                                 | 9.2                                                    | 24.7                                                   |
| <b>Refinement</b>                                                          |                                                        |                                                        |
| Resolution                                                                 | 32.0 – 1.10                                            | 12.0 – 2.10                                            |
| Reflections (R <sub>free</sub> )                                           | 116060 (2000)                                          | 13989 (686)                                            |
| R <sub>cryst</sub> / R <sub>free</sub>                                     | 0.114 / 0.128                                          | 0.187 / 0.265                                          |
| Mean B factor (Å <sup>2</sup> )<br>Overall / chain A /<br>chain B/ solvent | 17.2 / 14.5 / 17.5 / 35.3                              | 38.0 / 35.2 / 39.3 / 43.1<br>(H/D)                     |
| Ramachandran                                                               | 98.3 % most favored<br>1.7 % allowed<br>0 % disallowed | 97.2 % most favored<br>2.8 % allowed<br>0 % disallowed |
| Rmsd bonds (Å)                                                             | 0.008                                                  | 0.002                                                  |
| Rmsd angles (deg)                                                          | 0.975                                                  | 0.560                                                  |
| Atoms (non-solvent /<br>solvent / H and D<br>atoms)                        | 2279 / 299 / 2541                                      | 2207 / 231 / 2946                                      |

**Table S2. Cu coordination environment in X-ray structures of NcLPMO9D<sup>a</sup> and JdLPMO10A**

| Distance (Å)                   |                        |                   |                           |                         |            |
|--------------------------------|------------------------|-------------------|---------------------------|-------------------------|------------|
| ATOMS                          | NcLPMO9D<br>Molecule A | Molecule B        | ATOMS                     | JdLPMO10A<br>Molecule A | Molecule B |
| Cu-His1-N $\delta$             | 1.93                   | 1.95              | Cu-His32-N $\delta$       | 2.01                    | 2.01       |
| Cu-His1-Namino                 | 2.19                   | 2.20              | Cu-His32-Namino           | 2.17                    | 2.14       |
| Cu-His84-N $\epsilon$          | 1.97                   | 1.90              | Cu-His109-N $\epsilon$    | 2.00                    | 2.01       |
| Cu-Y168-OH                     | 2.66                   | 2.73              |                           |                         |            |
| Cu-H <sub>2</sub> O equatorial |                        | 2.06              |                           |                         |            |
| Cu-H <sub>2</sub> O axial      | 2.36                   | 2.23              | Cu-H <sub>2</sub> O axial | 2.45                    | 2.34       |
| Cu-O1 (proximal)               | 1.90                   | 3.57 <sup>b</sup> | Cu-O2 (proximal)          | 1.84                    | 1.83       |
|                                |                        |                   | Cu-O1 (distal)            | 2.14                    | 2.69       |
| O1-O2                          | 1.44                   | 1.20              | O1-O2 <sup>c</sup>        | 1.48                    | 1.46       |
|                                |                        |                   | B (Cu, Å <sup>2</sup> )   | 11.40                   | 11.85      |
|                                |                        |                   | Occupancy (Cu)            | 0.84                    | 0.89       |
|                                |                        |                   | B (O1, Å <sup>2</sup> )   | 48.65                   | 33.23      |
|                                |                        |                   | Occupancy (O1)            | 0.83                    | 0.95       |
|                                |                        |                   | B (O2, Å <sup>2</sup> )   | 48.62                   | 31.01      |
|                                |                        |                   | Occupancy (O2)            | 0.83                    | 0.95       |

<sup>a</sup> Data taken from the ascorbate-treated X-ray structure (5TKH) (O'Dell *et al.*, 2017)

<sup>b</sup> In molecule B, the oxygen is in a proposed "pre-bound" state, interacting primarily with His157. The oxygen does not directly interact with the copper and does not displace the water molecule occupying the equatorial copper coordination position.

<sup>c</sup> Cu-bound O<sub>2</sub>-species are modeled as Cu-bound peroxide (Cu-O-O<sup>-</sup>)

**Figure S1.** Omit maps for the dioxygen species bound to the copper in the RT X-ray structure of *JdLPMO10A*. A-C.  $F_o - F_c$  omit map for molecule A, omitting O1 (A), O2 (B), axial water (C). D-E.  $F_o - F_c$  omit map for molecule B, omitting O1 (D), O2 (E). Maps are contoured at +5.0 sigma (green) and -5.0 sigma (red).

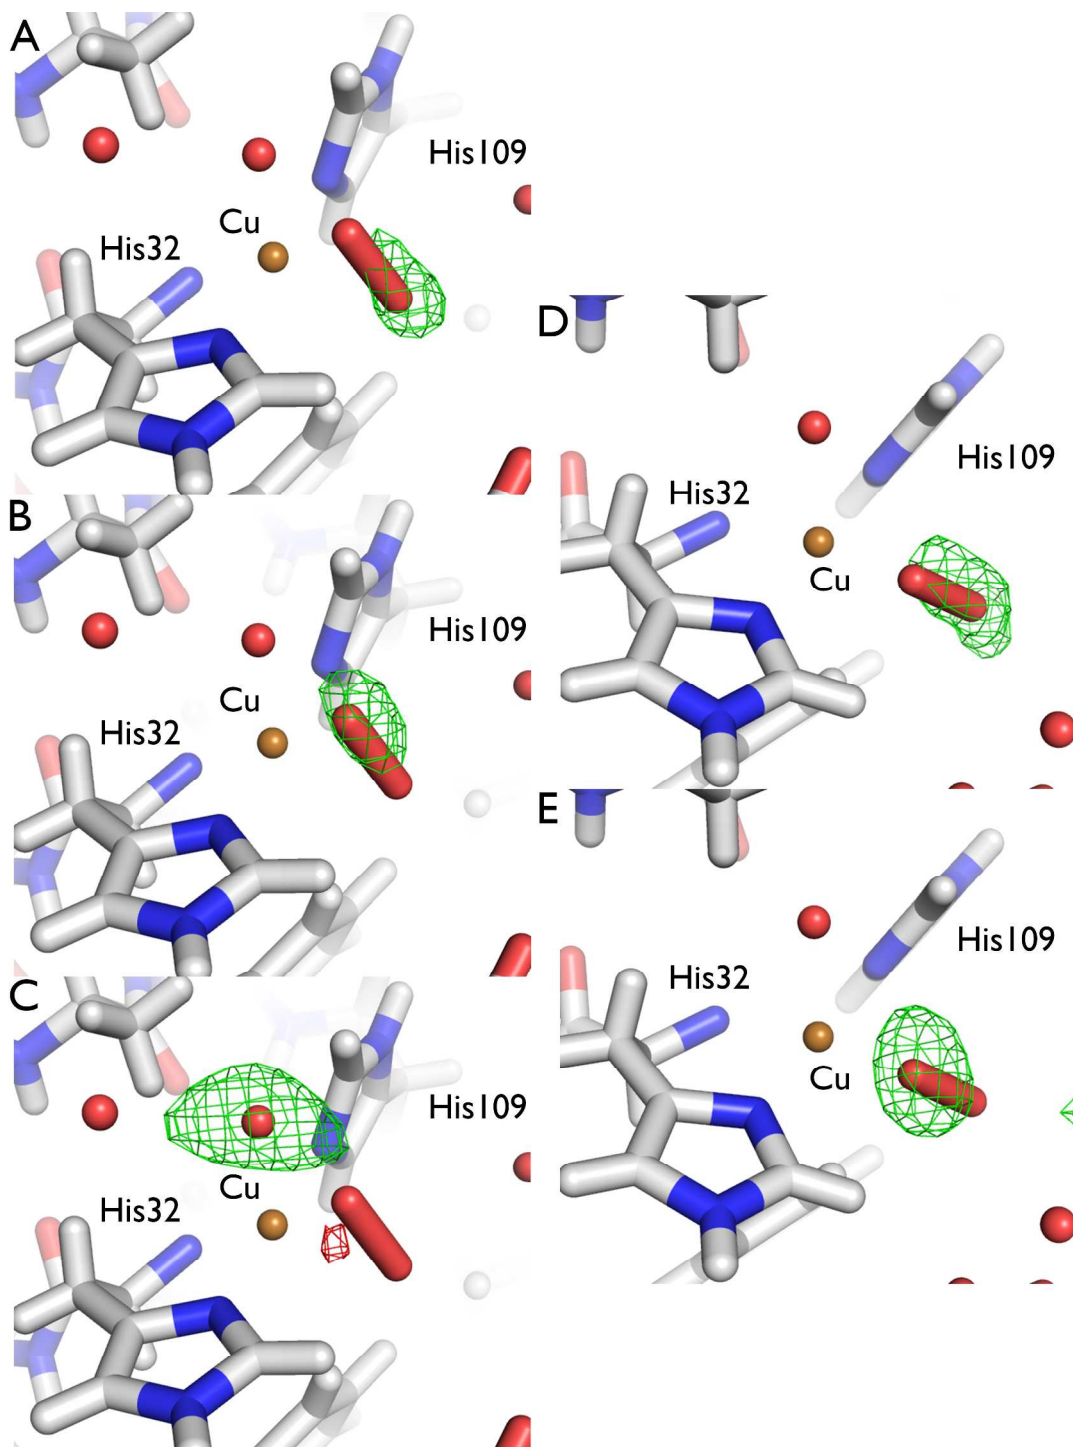

**Figure S2.** Nuclear density omit map of molecule B N-terminal region, contoured at +3.0 sigma (green), and -3.0 sigma (red). The deuterium on the right, which is bonded to the carbonyl group of Ala107, was set to an occupancy of 1.0, as full exchange for D is expected. The occupancy of the left D was set to 0 (A), 0.25 (B), 0.50 (C), 0.75 (D), and 1.0 (E). As can be seen in (E), full occupancy of the site results in the presence of a negative peak (red), indicating a mix of  $\text{ND}^-$  and  $\text{ND}_2$  species.

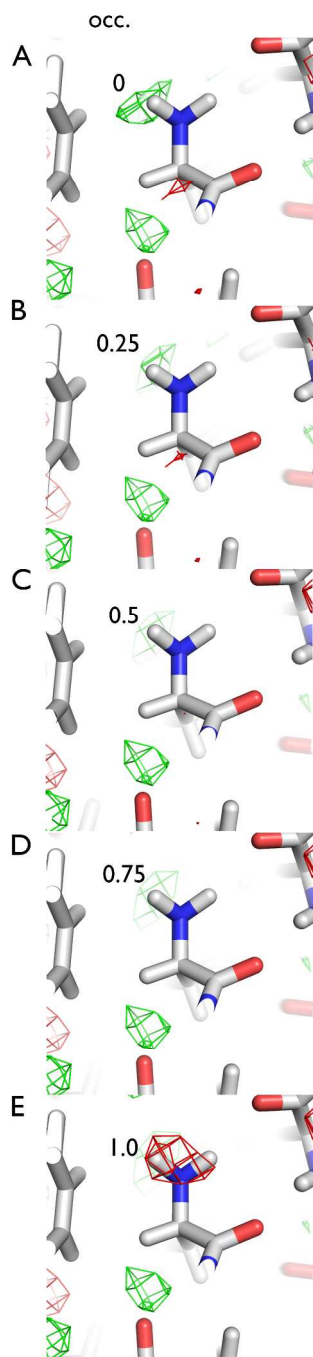

**Figure S3.** A.  $F_o - F_c$  difference density for hydrogen atoms at the N-terminal region of molecule B, showing a mix of  $\text{ND}^-$  and  $\text{ND}_2$  forms. The map is contoured at +3.0 sigma (green) and -3.0 sigma (red). B.  $F_o - F_c$  difference density for the N-terminal region of *NcLPMO9M* (also known as NCU07898; PDB 4EIS) (Li *et al.*, 2012), showing a negative (red) peak at the position of one of the hydrogen atoms. The map is contoured at -3.0 sigma.

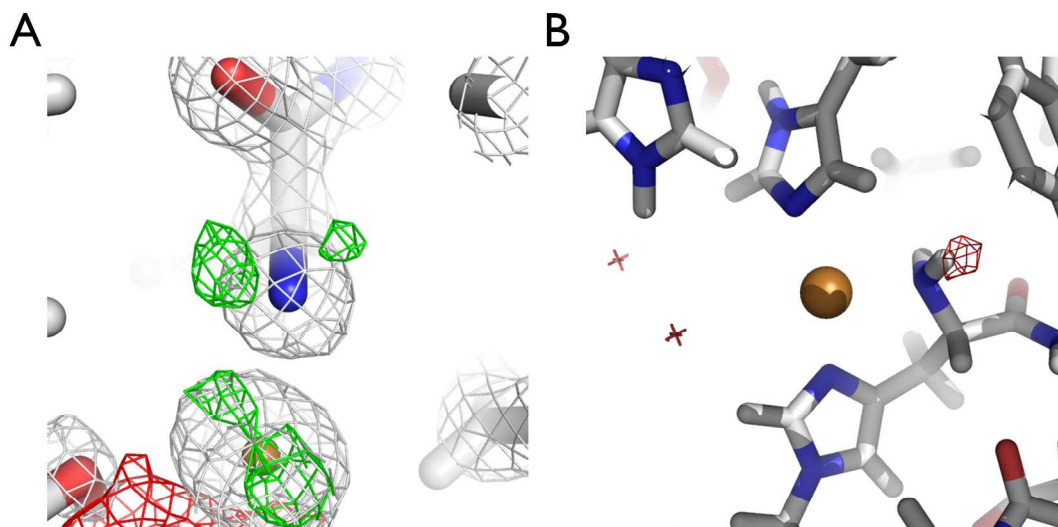

## References

Bacik, J.-P., Mekasha, S., Forsberg, Z., Kovalevsky, A., Nix, J. C., Cuneo, M. J., Coates, L., Vaaje-Kolstad, G., Chen, J. C.-H., Eijsink, V. G. H., and Unkefer, C. J. (2015) *Acta Crystallogr. F* **71**, 1448-1452.

Li, X., Beeson, W. T. I. V., Phillips, C. M., Marletta, M. A., and Cate, J. H. D. (2012) *Structure* **20**, 1051-1061.

Mekasha, S., Forsberg, Z., Dalhus, B., Bacik, J.-P., Choudhary, S., Schmidt-Dannert, C., Vaaje-Kolstad, G., and Eijsink, V. G. H. (2016) *FEBS Lett.* **590**, 34-42.

O'Dell, W. B., Agarwal, P. K., and Meilleur, F. (2017) *Angew. Chem. Int. Ed.* **56**, 767-770.
